# Supplementary material for: Comparing Prognostic Factors of Cancers Identified by Artificial Intelligence (AI) and Human Readers in Breast Cancer Screening
Source: Cancers (Basel). 2023 Jun 6;15(12):3069. doi: 10.3390/cancers15123069 (PMC10296295; doi:10.3390/cancers15123069)
Supplement: Supplementary file 1 [file cancers-15-03069-s001.zip › cancers-2340101-supplementary.pdf]

# Comparing prognostic factors of cancers identified by Artificial Intelligence (AI) and human readers in breast cancer screening

Cary J.G. Oberije, Nisha Sharma, Jonathan James, Annie Y. Ng, Jonathan Nash and Peter D. Kecskemethy

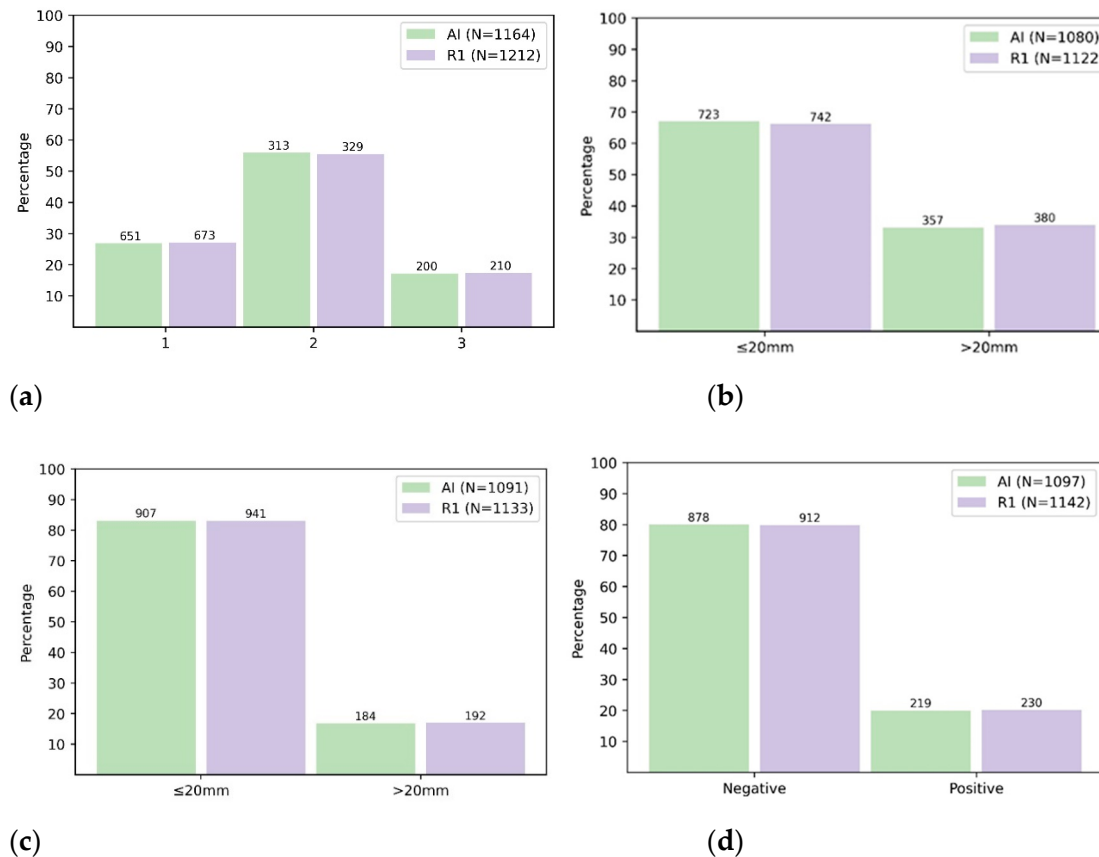

**Figure S1.** (a) Barplot Histological grade; (b) Barplot whole tumour size; (c) Barplot invasive tumour size; (d) Barplot lymph node stage.

**Table S1.** Agreement between human reader and AI for detection of cancers

|                          | Screen-detected cancers |       | Interval cancers |       | All cancers |       |
|--------------------------|-------------------------|-------|------------------|-------|-------------|-------|
|                          | N= 1718                 |       | N= 293           |       | N= 2011     |       |
| R1 only                  | 196                     | 11.4% | 8                | 2.7%  | 204         | 10.1% |
| AI only                  | 111                     | 6.5%  | 80               | 27.3% | 191         | 9.5%  |
| Detected by both         | 1364                    | 79.4% | 13               | 4.4%  | 1377        | 68.5% |
| Not detected by R1 or AI | 47                      | 2.7%  | 192              | 65.5% | 239         | 11.9% |

*Abbreviations:* R1 = human reader 1; AI = artificial intelligence

**Table S2a. Size of invasive cancers detected on screen by human reader or AI**

|                      |          | detected by R1 |       |        |   |       | detected by AI |       |        |   |       |
|----------------------|----------|----------------|-------|--------|---|-------|----------------|-------|--------|---|-------|
|                      |          | N=1261         | %     | 95% CI |   |       | N=1213         | %     | 95% CI |   |       |
| Whole tumour size    | ≤5 mm    | 38             | 3.4%  | 2.5%   | - | 4.6%  | 32             | 3.0%  | 2.1%   | - | 4.2%  |
|                      | 5-10 mm  | 205            | 18.3% | 16.1%  | - | 20.6% | 201            | 18.6% | 16.4%  | - | 21.0% |
|                      | 10-20 mm | 499            | 44.5% | 41.6%  | - | 47.4% | 490            | 45.4% | 42.4%  | - | 48.4% |
|                      | 20-50 mm | 332            | 29.6% | 27.0%  | - | 32.3% | 311            | 28.8% | 26.2%  | - | 31.6% |
|                      | >50      | 48             | 4.3%  | 3.2%   | - | 5.6%  | 46             | 4.3%  | 3.2%   | - | 5.6%  |
|                      | Missing  | 139            |       |        |   |       | 133            |       |        |   |       |
| Invasive tumour size | ≤5 mm    | 114            | 10.1% | 8.4%   | - | 12.0% | 109            | 10.0% | 8.3%   | - | 11.9% |
|                      | 5-10 mm  | 308            | 27.2% | 24.7%  | - | 29.8% | 288            | 26.4% | 23.9%  | - | 29.1% |
|                      | 10-20 mm | 519            | 45.8% | 42.9%  | - | 48.7% | 510            | 46.7% | 43.8%  | - | 49.7% |
|                      | 20-50 mm | 180            | 15.9% | 13.9%  | - | 18.1% | 174            | 15.9% | 13.9%  | - | 18.2% |
|                      | >50      | 12             | 1.1%  | 0.6%   | - | 1.8%  | 10             | 0.9%  | 0.5%   | - | 1.7%  |
|                      | Missing  | 128            |       |        |   |       | 122            |       |        |   |       |

*Abbreviations:* R1 = Human reader 1, AI = artificial intelligence

**Table S2b. Size of invasive interval cancers detected by human reader or AI**

|                      |          | detected by R1 |       |        |   |       | detected by AI |       |        |   |       |
|----------------------|----------|----------------|-------|--------|---|-------|----------------|-------|--------|---|-------|
|                      |          | N=15           | %     | 95% CI |   |       | N=65           | %     | 95% CI |   |       |
| Whole tumour size    | ≤5 mm    | 0              | 0.0%  |        |   |       | 2              | 4.7%  | 1.3%   | - | 15.5% |
|                      | 5-10 mm  | 0              | 0.0%  |        |   |       | 2              | 4.7%  | 1.3%   | - | 15.5% |
|                      | 10-20 mm | 3              | 37.5% | 13.7%  | - | 69.4% | 15             | 34.9% | 22.4%  | - | 49.8% |
|                      | 20-50 mm | 5              | 62.5% | 30.6%  | - | 86.3% | 20             | 46.5% | 32.5%  | - | 61.1% |
|                      | >50      | 0              | 0.0%  | 0.0%   | - | 32.4% | 4              | 9.3%  | 3.7%   | - | 21.6% |
|                      | Missing  | 7              |       |        |   |       | 22             |       |        |   |       |
| Invasive tumour size | ≤5 mm    | 1              | 7.1%  | 1.3%   | - | 31.5% | 4              | 6.7%  | 2.6%   | - | 15.9% |
|                      | 5-10 mm  | 3              | 21.4% | 7.6%   | - | 47.6% | 5              | 8.3%  | 3.6%   | - | 18.1% |
|                      | 10-20 mm | 5              | 35.7% | 16.3%  | - | 61.2% | 25             | 41.7% | 30.1%  | - | 54.3% |
|                      | 20-50 mm | 5              | 35.7% | 16.3%  | - | 61.2% | 22             | 36.7% | 25.6%  | - | 49.3% |
|                      | >50      | 0              | 0.0%  |        |   |       | 4              | 6.7%  | 2.6%   | - | 15.9% |
|                      | Missing  | 1              |       |        |   |       | 5              |       |        |   |       |

*Abbreviations:* R1 = Human reader 1, AI = artificial intelligence

**Table S3a.** Sensitivity per prognostic subgroup for screen-detected cancers

| Variable             |             | N    | Detected AI | SEN AI | 95% CI        | Detected<br>R1 | SEN R1 | 95% CI        | P      |
|----------------------|-------------|------|-------------|--------|---------------|----------------|--------|---------------|--------|
| Invasive Component   | not present | 326  | 258         | 79.1%  | 74.8% - 83.5% | 293            | 89.9%  | 86.5% - 93.1% | <0.001 |
|                      | present     | 1385 | 1213        | 87.6%  | 85.8% - 89.3% | 1261           | 91.0%  | 89.5% - 92.6% | 0.002  |
|                      | missing     | 7    |             |        |               |                |        |               |        |
| Tumour grade         | grade 1     | 371  | 313         | 84.4%  | 80.6% - 87.9% | 329            | 88.7%  | 85.3% - 91.8% | 0.089  |
|                      | grade 2     | 738  | 651         | 88.2%  | 85.8% - 90.5% | 673            | 91.2%  | 89.1% - 93.2% | 0.059  |
|                      | grade 3     | 224  | 200         | 89.3%  | 85.2% - 93.1% | 210            | 93.8%  | 90.5% - 96.8% | 0.099  |
|                      | missing     | 52   |             |        |               |                |        |               |        |
| Whole tumour size    | ≤20 mm      | 831  | 723         | 87.0%  | 84.7% - 89.3% | 742            | 89.3%  | 87.1% - 91.3% | 0.148  |
|                      | >20 mm      | 408  | 357         | 87.5%  | 84.2% - 90.7% | 380            | 93.1%  | 90.7% - 95.5% | 0.006  |
|                      | missing     | 146  |             |        |               |                |        |               |        |
| Invasive tumour size | ≤20 mm      | 1045 | 907         | 86.8%  | 84.7% - 88.8% | 941            | 90.0%  | 88.2% - 91.8% | 0.017  |
|                      | >20 mm      | 205  | 184         | 89.8%  | 85.3% - 93.9% | 192            | 93.7%  | 90.3% - 96.9% | 0.185  |
|                      | missing     | 135  |             |        |               |                |        |               |        |
| Lymph node status    | negative    | 1017 | 878         | 86.3%  | 84.1% - 88.4% | 912            | 89.7%  | 87.7% - 91.5% | 0.018  |
|                      | positive    | 243  | 219         | 90.1%  | 86.3% - 93.8% | 230            | 94.7%  | 91.7% - 97.4% | 0.071  |
|                      | missing     | 125  |             |        |               |                |        |               |        |

*Abbreviations:* AI = artificial intelligence; R1 = human reader 1; CI = confidence interval; SEN = sensitivity

Tumour grade, whole tumour size, invasive tumour size and lymph node status were only assessed for cancers that had an invasive component present

P values are based on McNemar's test

**Table S3b.** Sensitivity per prognostic subgroup for interval cancers

| Variable             |             | N   | Detected AI | SEN AI | 95% CI        | Detected<br>R1 | SEN R1 | 95% CI       | P      |
|----------------------|-------------|-----|-------------|--------|---------------|----------------|--------|--------------|--------|
| Invasive Component   | not present | 15  | 6           | 40.0%  | 14.3% - 66.7% | 1              | 6.7%   | 0.0% - 23.1% | 0.0625 |
|                      | present     | 222 | 65          | 29.3%  | 23.5% - 35.3% | 15             | 6.8%   | 3.6% - 10.2% | <0.001 |
|                      | missing     | 56  |             |        |               |                |        |              |        |
| Tumour grade         | grade 1     | 30  | 16          | 53.3%  | 35.5% - 70.8% | 3              | 10.0%  | 0.0% - 22.2% | <0.001 |
|                      | grade 2     | 107 | 25          | 23.4%  | 15.4% - 31.6% | 7              | 6.5%   | 2.1% - 11.7% | <0.001 |
|                      | grade 3     | 83  | 23          | 27.7%  | 18.2% - 37.1% | 5              | 6.0%   | 1.3% - 11.6% | <0.001 |
|                      | missing     | 2   |             |        |               |                |        |              |        |
| Whole tumour size    | ≤20         | 80  | 19          | 23.8%  | 14.8% - 33.3% | 3              | 3.8%   | 0.0% - 8.5%  | <0.001 |
|                      | >20         | 84  | 24          | 28.6%  | 18.9% - 38.5% | 5              | 6.0%   | 1.2% - 11.5% | <0.001 |
|                      | missing     | 58  |             |        |               |                |        |              |        |
| Invasive tumour size | ≤20         | 123 | 34          | 27.6%  | 20.0% - 35.8% | 9              | 7.3%   | 3.0% - 12.6% | <0.001 |
|                      | >20         | 84  | 26          | 31.0%  | 21.2% - 41.1% | 5              | 6.0%   | 1.3% - 11.5% | <0.001 |
|                      | missing     | 15  |             |        |               |                |        |              |        |
| Lymph node status    | negative    | 93  | 28          | 30.1%  | 20.9% - 39.8% | 6              | 6.5%   | 2.1% - 12.0% | <0.001 |
|                      | positive    | 55  | 16          | 29.1%  | 16.9% - 42.1% | 4              | 7.3%   | 1.5% - 14.6% | <0.001 |
|                      | missing     | 74  |             |        |               |                |        |              |        |

*Abbreviations:* AI = artificial intelligence; R1 = human reader 1; CI = confidence interval; SEN = sensitivity

Tumour grade, whole tumour size, invasive tumour size and lymph node status were only assessed for cancers that had an invasive component present

P values are based on McNemar's test

**Table S4.** Relative Sensitivity of AI and R1 per subgroup for screen-detected and interval cancers combined

| Variable             |             | Total Detected |      |              |            |               | Total Detected |               |            |               |
|----------------------|-------------|----------------|------|--------------|------------|---------------|----------------|---------------|------------|---------------|
|                      |             | N              | R1   | Detected AI* | Rel SEN AI | 95% CI        | AI             | Detected R1** | Rel SEN R1 | 95% CI        |
| Invasive Component   | present     | 1607           | 1276 | 1129         | 88.5%      | 86.7% - 90.2% | 1278           | 1129          | 88.3%      | 86.5% - 90.1% |
|                      | not present | 341            | 294  | 242          | 82.3%      | 77.8% - 86.5% | 264            | 242           | 91.7%      | 88.2% - 94.9% |
|                      | missing     | 63             |      |              |            |               |                |               |            |               |
| Tumour grade         | grade 1     | 401            | 332  | 284          | 85.5%      | 81.8% - 89.3% | 329            | 284           | 86.3%      | 82.7% - 89.9% |
|                      | grade 2     | 845            | 680  | 604          | 88.8%      | 86.4% - 91.2% | 676            | 604           | 89.3%      | 87.0% - 91.6% |
|                      | grade 3     | 307            | 215  | 194          | 90.2%      | 86.0% - 93.9% | 223            | 194           | 87.0%      | 82.5% - 91.2% |
|                      | missing     | 54             |      |              |            |               |                |               |            |               |
| Whole tumour size    | ≤20 mm      | 911            | 745  | 656          | 88.1%      | 85.7% - 90.3% | 742            | 656           | 88.4%      | 86.0% - 90.6% |
|                      | >20 mm      | 492            | 385  | 338          | 87.8%      | 84.4% - 91.0% | 381            | 338           | 88.7%      | 85.5% - 91.6% |
|                      | missing     | 204            |      |              |            |               |                |               |            |               |
| Invasive tumour size | ≤20 mm      | 1168           | 950  | 833          | 87.7%      | 85.6% - 89.7% | 941            | 833           | 88.5%      | 86.5% - 90.5% |
|                      | >20 mm      | 289            | 197  | 178          | 90.4%      | 86.0% - 94.3% | 210            | 178           | 84.8%      | 80.1% - 89.5% |
|                      | missing     | 150            |      |              |            |               |                |               |            |               |
| Lymph node status    | negative    | 1110           | 918  | 801          | 87.3%      | 85.1% - 89.4% | 906            | 801           | 88.4%      | 86.3% - 90.4% |
|                      | positive    | 298            | 234  | 213          | 91.0%      | 87.3% - 94.4% | 235            | 213           | 90.6%      | 86.8% - 94.4% |
|                      | missing     | 199            |      |              |            |               |                |               |            |               |

*Abbreviations:* AI = artificial intelligence; R1 = human reader 1; Rel SEN = relative sensitivity; CI = confidence interval

\* Detected AI is the subgroup of cancers detected by AI that is also detected by R1

\*\* Detected R1 is the subgroup of cancers detected by R1 that is also detected by the AI
